# Supplementary material for: Encapsulated Carbenoxolone Reduces Lung Metastases
Source: MDPI journal article supplement (doi:10.3390/cancers11091383), 2019-09-17
Supplement: s1 [file s1]

## Supplementary Materials

Size of the different formulations was analyzed with DLS. Figure S1 summarizes the results.

### Carbenoxolone Tween 80 Particles

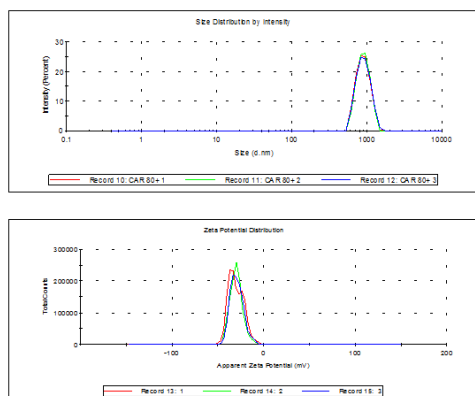

### Empty Tween 80 Particles

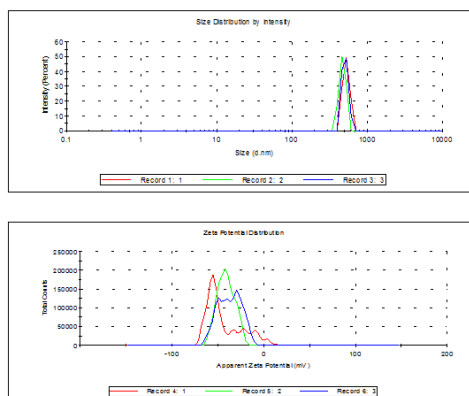

### Carbenoxolone Particles

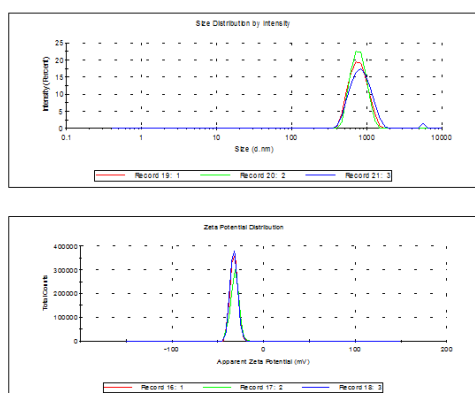

### Empty Particles

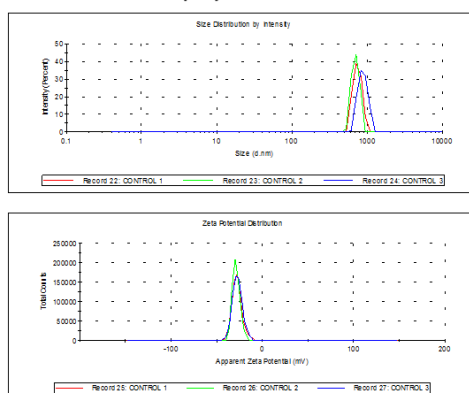

**Figure S1: DLS analysis of drug-encapsulated and empty particle formulations.**

DLS (Dynamic light scattering) analysis showing Zeta potential and size distributions of all 4 formulations: Empty particles, drug(Carbenoxolone)-loaded particles, Tween 80 empty particles, and Tween 80 drug-loaded particles.

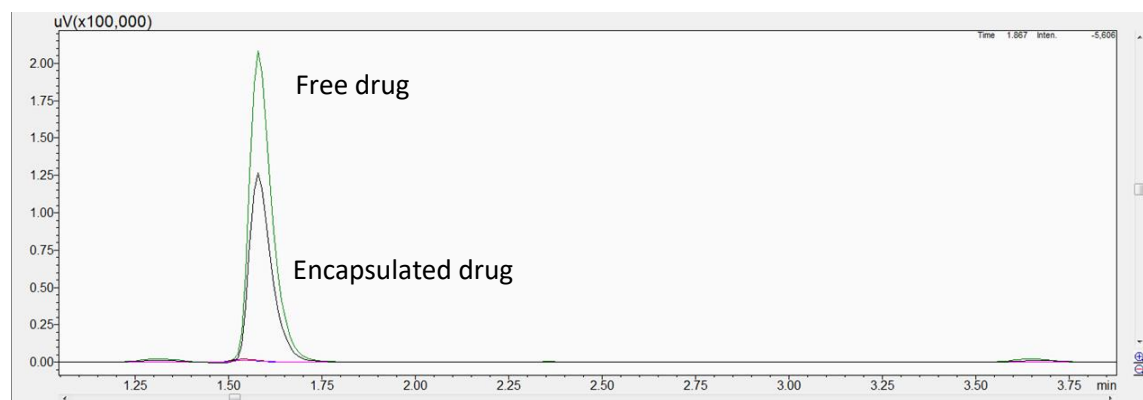

**Figure S2: Stability of free Carbenoxolone vs. encapsulated drug:** HPLC of Carbenoxolone encapsulated vs. the free form over 96 hours.

**Table S1: Summary of Size of metastatic lesions in the lungs of mice post intranasal administration.**

| Drug loaded particles | <250 $\mu\text{m}$ | 250-500 $\mu\text{m}$ | >500 $\mu\text{m}$ | Sum  |
|-----------------------|--------------------|-----------------------|--------------------|------|
| D11                   | 13                 | 12                    | 20                 | 45   |
| D13                   | 14                 | 11                    | 18                 | 43   |
| D14                   | 21                 | 15                    | 17                 | 53   |
| D15                   | 13                 | 19                    | 24                 | 56   |
| D16                   | 7                  | 10                    | 12                 | 29   |
| D17                   | 16                 | 8                     | 11                 | 35   |
| D18                   | 14                 | 12                    | 20                 | 46   |
| D19                   | 13                 | 6                     | 7                  | 26   |
| Average               | 13.9               | 11.6                  | 16.1               | 41.6 |

  

| Empty particles | <250 $\mu\text{m}$ | 250-500 $\mu\text{m}$ | >500 $\mu\text{m}$ | Sum  |
|-----------------|--------------------|-----------------------|--------------------|------|
| E20             | 24                 | 12                    | 21                 | 57   |
| E21             | 13                 | 16                    | 32                 | 61   |
| E22             | 37                 | 19                    | 12                 | 68   |
| E23             | 25                 | 18                    | 12                 | 55   |
| E24             | 18                 | 10                    | 25                 | 53   |
| E25             | 36                 | 12                    | 28                 | 76   |
| E26             | 17                 | 19                    | 29                 | 65   |
| Average         | 24.3               | 15.1                  | 22.7               | 62.1 |

  

| Control | <250 $\mu\text{m}$ | 250-500 $\mu\text{m}$ | >500 $\mu\text{m}$ | Sum  |
|---------|--------------------|-----------------------|--------------------|------|
| C1      | 17                 | 9                     | 24                 | 50   |
| C2      | 18                 | 17                    | 23                 | 58   |
| C3      | 28                 | 9                     | 29                 | 66   |
| C4      | 21                 | 28                    | 35                 | 84   |
| C5      | 13                 | 8                     | 30                 | 51   |
| C6      | 16                 | 17                    | 21                 | 54   |
| C7      | 11                 | 7                     | 38                 | 56   |
| C8      | 18                 | 11                    | 24                 | 53   |
| C9      | 23                 | 11                    | 20                 | 54   |
| Average | 18.3               | 13.0                  | 27.1               | 58.4 |

**Table S2: Summary and p value of Size of metastatic lesions in the lungs of mice post intranasal administration.**

| Treatment             | Average | stdev | SE  |
|-----------------------|---------|-------|-----|
| Drug loaded particles | 41.6    | 10.8  | 3.8 |
| Empty particles       | 62.1    | 8.1   | 3.1 |
| Control (naïve)       | 58.4    | 10.7  | 3.6 |

| ttest             |        |
|-------------------|--------|
| Drug vs. Empty    | 0.0012 |
| Drug vs. Control  | 0.0057 |
| Empty vs. Control | 0.46   |

**Table S3: Indication Toxicity (weight loss) of mice under treatment with 50 mg/kg of Carbenoxolone in its free form**

| Treatment     | Day 1 | Day 2 | Day 4 | Day 7 | Day 8 | Weight change [g] | Percentage | Average |
|---------------|-------|-------|-------|-------|-------|-------------------|------------|---------|
| Carbenoxolone | 28    | 26    | 26    | 23    | 23    | -5                | -18%       | -6%     |
| Carbenoxolone | 29    | 29    | 26    | 28    | 27    | -2                | -7%        |         |
| Carbenoxolone | 30    | 29    | 28    | 29    | 30    | 0                 | 0%         |         |
| Carbenoxolone | 33    | 32    | 31    | 33    | 31    | -2                | -6%        |         |
| Carbenoxolone | 32    | 29    | 31    | 32    | 33    | 1                 | 3%         |         |
| Carbenoxolone | 26    | 24    | 25    | 23    | 24    | -2                | -8%        |         |
| Cont          | 32    | 32    | 32    | 32    | 33    | 1                 | 3%         | 3%      |
| Cont          | 28    | 28    | 29    | 28    | 29    | 1                 | 4%         |         |
| Cont          | 31    | 31    | 31    | 31    | 32    | 1                 | 3%         |         |
| Cont          | 26    | 27    | 28    | 28    | 28    | 2                 | 8%         |         |
| Cont          | 30    | 30    | 29    | 30    | 32    | 2                 | 7%         |         |
| Cont          | 29    | 28    | 29    | 29    | 28    | -1                | -3%        |         |

***Protocol for preparation of drug-loaded and empty particles***

PLGA (100 mg, Sigma-Aldrich, Cat. No. 739952) with 50:50 lactic-to-glycolic acid ratio was dissolved in 2 ml dichloromethane. A solution of Carbenoxolone in PBS (140 mg/ml) was added (200 µl) to the dissolved polymer, and the mixture was homogenized using WiseTis Homogenize (type HG-15D, Witeg, Germany) for 1 min on ice, leading to the formation of the first emulsion (W/O). Poly-vinyl alcohol (PVA) 5% w/v of ~67 kDa (Sigma-Aldrich, Cat. No. 81383) saturated in dichloromethane (4 ml) was rapidly added

to the first emulsion, and the solution was homogenized for the second time. The primary emulsion was then emulsified into 50 ml of 2.5% w/v aqueous solution of polyvinyl alcohol (PVA). The resulting multiple W/O/W were mixed for 5 minutes, and 2.5 ml of cold Isopropanol were added to the W/O/W double emulsion. After 60 minutes of extensive stirring, the microspheres were centrifuged and washed three times. After the final wash, the microspheres were lyophilized (Freezone 6 plus, Labconco, U.S.) for 48 hours, resulting in a fine powder of dry PLGA microspheres that contained Carbenoxolone. An additional preparation was done with Tween 80 (Thermo Fisher Scientific, Cat. No. BP338-500), where 84  $\mu$ l of Tween 80 were added after the addition of the drug. Empty microspheres were prepared in the same way without Carbenoxolone, one batch for each preparation (with and without surfactant). Morphological studies with a scanning electron microscope (SEM) and size distribution Microspheres were conducted for characterization. All particles characterizations and experiments were performed post-lyophilization.
